# Supplementary material
Source: PubMed Central journal article supplement (PMC7993108)
Supplement: advancesADV2020003749-suppl1.pdf [file advancesADV2020003749-suppl1.pdf]

## Adult Post Hematopoietic Cell Transplant Vaccine Guidelines

|           |                                                      |
|-----------|------------------------------------------------------|
| 9 months  | DTaP, HiB, IPV, Prevnar, Shingrix                    |
| 12 months | DTaP, HiB, IPV, Prevnar, Menactra, Twinrix, Shingrix |
| 14 months | Hep B, Menactra                                      |
| 18 months | DTaP, HiB, IPV, Prevnar, Twinrix                     |
| 24 months | MMR, Pneumovax                                       |

| Vaccine                                                         | Comments                                                                                                                                                                                                                                                                                                                                                                |
|-----------------------------------------------------------------|-------------------------------------------------------------------------------------------------------------------------------------------------------------------------------------------------------------------------------------------------------------------------------------------------------------------------------------------------------------------------|
| Diphtheria/Tetanus/<br>Pertussis<br>(DTaP; Daptacel)            | <ul style="list-style-type: none"> <li>• Inactivated; Given IM</li> <li>• May be initiated as early as 6 months post HSCT *</li> <li>• Do not confuse with Tdap – Patients should be vaccinated with Tdap every 10 years</li> </ul>                                                                                                                                     |
| Haemophilus Influenzae<br>type B<br>(HiB; ActHiB)               | <ul style="list-style-type: none"> <li>• Inactivated; Given IM</li> <li>• Haemophilus is bound to tetanus toxoid. Tetanus component of this vaccine is not a therapeutic substitution for tetanus vaccine (only contains 24mcg of tetanus toxoid).</li> <li>• May be initiated as early as 6 months post HSCT *</li> <li>• Product diluent may contain LATEX</li> </ul> |
| Pneumococcal conjugate<br>13-valent<br>(Prevnar; PCV13)         | <ul style="list-style-type: none"> <li>• Inactivated; Given IM</li> <li>• May be initiated as early as 3-6 months post HSCT *</li> <li>• Patients with cGVHD should consider fourth dose of PCV13 in place of PPSV23</li> </ul>                                                                                                                                         |
| Hepatitis A<br>(Havrix)                                         | <ul style="list-style-type: none"> <li>• Inactivated; Given IM</li> <li>• May be initiated as early as 6 months post HSCT *</li> </ul>                                                                                                                                                                                                                                  |
| Hepatitis B<br>(Engix B)                                        | <ul style="list-style-type: none"> <li>• All products may contain LATEX (individual and combo vaccines)<br/><i>Hep A+ Hep B (Twinrix)</i></li> </ul>                                                                                                                                                                                                                    |
| Meningococcal conjugate<br>(Menactra)                           | <ul style="list-style-type: none"> <li>• Inactivated; Given IM</li> <li>• May be initiated as early as 6 months post HSCT *</li> </ul>                                                                                                                                                                                                                                  |
| Influenza<br>(Fluzone)                                          | <ul style="list-style-type: none"> <li>• Inactivated; Given IM annually</li> <li>• May be given as early as 3-6 months post-transplant. (If given at &lt;6 months, then second dose needs to be given after 6 months if still during flu season)</li> <li>• Refer to institution's annual flu policy</li> </ul>                                                         |
| Pneumococcal<br>polysaccharide 23-valent<br>(Pneumovax; PPSV23) | <ul style="list-style-type: none"> <li>• Inactivated; Can be given IM or SC</li> <li>• May be initiated as early as 12 months post HSCT if no GVHD* or ongoing immunosuppression</li> <li>• Patients with cGVHD should consider fourth dose of PCV13 in place of PPSV23</li> </ul>                                                                                      |
| Poliovirus<br>(IPOL / IVP)                                      | <ul style="list-style-type: none"> <li>• Inactivated; Can be given IM or SC</li> <li>• May be initiated as early as 6 months post HSCT *</li> </ul>                                                                                                                                                                                                                     |
| Measles/Mumps/Rubella<br>a<br>(MMR)                             | <ul style="list-style-type: none"> <li>• <b>LIVE VIRUS- Administer immediately; Given SC</b></li> <li>• <b>Light protect at all times; vaccine can be inactivated with light exposure</b></li> <li>• Caution in egg allergy</li> <li>• Do not give if patient has active GVHD or ongoing immunosuppression</li> </ul>                                                   |
| Subunit Varicella Zoster<br>vaccine<br>(Shingrix)               | <ul style="list-style-type: none"> <li>• <b>Subunit adjuvanted vaccine (not a live vaccine); Given IM.</b></li> <li>• Continue HSV prophylaxis for at least 1 month after 2-dose series is complete</li> <li>• 2-dose series post-transplant should occur 2-6 months apart</li> </ul>                                                                                   |

\* This is **NOT** a routine recommendation. Early administration may be considered on case by case basis using best clinical judgment.

- Patients likely have GVHD or ongoing immunosuppression if receiving IVIG, tacrolimus, sirolimus, steroids, etc
- Live vaccination should be separated by 8-11 months from last IVIG administration.
- Vaccination may be postponed if patient is receiving >20mg of prednisone or equivalent for ≥2weeks
- Consider administration of 3 doses of human papilloma virus (HPV) series in female and male patients ages 11-26. Series should be initiated at least 6-12 months post-transplant.

**References:** 1. Rubin LG et al. 2013 IDSA clinical practice guideline for vaccination of the immunocompromised host. *Clin Infect Dis* 2014;58:309-18; 2. Cheng MP et al. Safety and immunogenicity of conjugate quadrivalent meningococcal vaccination after hematopoietic cell transplantation. *Blood Adv* 2018;2:1272-6; 3. Chong PP et al. A Comprehensive Review of Immunization Practices in Solid Organ Transplant and Hematopoietic Stem Cell Transplant Recipients. *Clin Ther* 2017;39:1581-98; 4. Issa NC et al. Seroprotective titers against 2009 H1N1 influenza A virus after vaccination in allogeneic hematopoietic stem cell transplantation recipients. *Bio Blood Marrow Transplant* 2011;17:434-8; 5. De la serna et al. Abstract # LBA2, BMT Tandem meeting, Salt Lake City Feb 2018. Paper is submitted not published yet. 6. Pandit A et al. Safety of live-attenuated measles-mumps-rubella and herpes zoster vaccination in multiple myeloma patients on maintenance lenalidomide or bortezomib after autologous hematopoietic cell transplantation. *Bone Marrow Transplant* 2018;53:942-5; 7. NCCN Guidelines: Prevention and Treatment of Cancer-Related Infections v1.2018
